# Supplementary material
Source: PubMed Central journal article supplement (PMC3013058)
Supplement: NIHMS259907-supplement-Supporting_Information.pdf [file NIHMS259907-supplement-Supporting_Information.pdf]

## SUPPLEMENTARY INFORMATION

### Biosynthesis of the earthy odorant geosmin by a bifunctional *Streptomyces coelicolor* enzyme

Jiaoyang Jiang<sup>1</sup>, Xiaofei He<sup>1</sup> & David E. Cane<sup>1\*</sup>

<sup>1</sup>*Department of Chemistry, Box H, Brown University, Providence, Rhode Island 02912-9108, USA*

\* Correspondence: [David\\_Cane@brown.edu](mailto:David_Cane@brown.edu)

Tel: +1 401 863 3588

Fax: +1 401 863 9368

### Contents

|                                       |      |
|---------------------------------------|------|
| Construction of SCO6073 mutants.....  | 2    |
| Identification of isolepidozene ..... | 2-3  |
| Supplementary Table 1. ....           | 3    |
| Supplementary Table 2.....            | 3    |
| Supplementary Table 3.....            | 4    |
| Supplementary Figure 1 .....          | 5    |
| Supplementary Figure 2 .....          | 6    |
| Supplementary Figure 3 .....          | 6    |
| Supplementary Figure 4 .....          | 7    |
| Supplementary Figure 5 .....          | 8-10 |
| Supplementary Scheme 1 .....          | 10   |

**Construction of the C-terminal truncated mutant of SCO6073.** The C-terminal truncated mutant encoding aa 327-726 of SCO6073 was constructed by using *Pfu* turbo polymerase for PCR amplification of the *NcoI-XhoI* fragment of pRW31<sup>1</sup> using the forward primer Met327start, 5'-ATTTTATCCATGGTTATGAACAAGGGGGGAGCGGCC-3' in combination with the reverse primer rmwhalt4-histag, 5'-TAATAACTCGAGGTGCGTCAGTGC GG GACT-3'. (Underlined bases indicate restriction sites for *NcoI* and *XhoI*, respectively.) The resultant PCR product was purified immediately using a Qiaquick PCR purification kit (Qiagen), eluted with 50–60  $\mu$ l of 10 mM Tris-HCl, pH 8.5, then double-digested with *NcoI* and *XhoI* at 37 °C for 2.5 h, and repurified with the Qiaquick purification kit. The digested PCR product was ligated into *NcoI/XhoI*-digested pET21d using a 6:1 molar ratio of insert:vector and T4 DNA ligase. The ligation mixture was used to transform competent cells of *E. coli* XL1-Blue under standard conditions. The resulting transformants were grown overnight at 37 °C on LB-agar plates containing ampicillin (100  $\mu$ g/ml). Plasmid DNA was isolated from 18 individual colonies after overnight growth at 37 °C in LB-ampicillin (100  $\mu$ g/ml) medium and purified by using Qiagen spin miniprep kits. Plasmids were screened by *PstI* restriction digests and pJJ3 was sequenced to confirm the integrity of the inserted DNA sequences.

**Expression of C-terminal truncated mutant of SCO6073, pJJ3.** Plasmid pJJ3 was used to transform competent cells of *E. coli* BL21(DE3)pLysS. For expression of His<sub>6</sub>-tagged pJJ3 protein, a 500-ml culture of *E. coli* BL21(DE3)pLysS/pJJ3 was grown at 37 °C to an OD<sub>600</sub> of 0.7. The culture was cooled to 18 °C and induced with 0.4 mM IPTG, then incubated overnight at 18 °C. The cells were harvested by centrifugation (7,500g) and resuspended in 20 ml of cell lysis buffer (50 mM NaH<sub>2</sub>PO<sub>4</sub>, 300 mM NaCl, 10 % glycerol, 5 mM  $\beta$ -mercaptoethanol, pH 7.5). The cells were disrupted by French Press, and the mixture was centrifuged at 20,200g for 40 min. The supernatant was mixed with 5 ml of Ni-NTA resin, and mixed gently by shaking at 200 rpm on a rotary shaker at 4 °C for 1-2 h. The mixture of pJJ3-containing lysate and Ni-NTA was loaded into a column that was washed with 20 mM imidazole in cell lysis buffer. To elute the desired protein, the column was washed stepwise by 50, 100, 250 and 500 mM imidazole buffer. The desired C-terminal pJJ3 protein was eluted with 100-250 mM imidazole buffer, as monitored by SDS-PAGE. pJJ3 protein exhibited a single band of  $M_r$  46,000, consistent with the predicted  $M_p$  of 45,932 Da. After concentration of the C-terminal truncated protein using a Millipore Ultracel YM-10 membrane, a PD-10 column was used to exchange the imidazole buffer for reaction buffer (50 mM Tris-HCl, 20 % glycerol, pH 8.2). Using this method, 2-3 mg of soluble C-terminal truncated pJJ3 protein was isolated, with a purity of >95% by SDS-PAGE. Attempts to express alternative C-terminal truncated mutants corresponding aa 368-726 and aa 383-726 were unsuccessful.

**Germacradienol–geosmin synthase mutants.** The desired mutations were introduced by using the Stratagene QuikChange II XL Site-Directed Mutagenesis Kit in combination with the mutagenic primers listed in **Supplementary Table 1** and DNA from plasmid pRW31 as template. The identity of each of the mutations was verified by sequencing of the full-length gene. Each of the mutant plasmids was used to transform competent cells of the expression host *E. coli* BL21(DE3)pLysS under standard conditions. The resulting transformants were grown overnight at 37 °C on LB-agar plates containing ampicillin (100  $\mu$ g/ml) and chloramphenicol (34  $\mu$ g/ml). For expression of mutant S233A, a 500-ml culture of *E. coli* BL21(DE3)pLysS/pRW31S233A was grown at 37 °C to an OD<sub>600</sub> of 0.7. The culture was induced with 2 mM IPTG, then incubated for 4 h at 37 °C. The cells were harvested by centrifugation (7,500g) and resuspended in 40 ml of cell lysis buffer (50 mM Tris-HCl, 20% glycerol, 1 mM EDTA, pH 8.2). The remainder of the inclusion body solubilisation/refolding procedure followed the previously described protocol<sup>1</sup>.

**Identification of isolepidozene (6) produced by the S233A mutant of germacradienol–geosmin**

**synthase.** GC–MS analysis of the product mixture resulting from incubation of FPP with the pRW31\_S233A mutant showed a pair of overlapping peaks centered at a retention time of 10.24 min (**Supplementary Fig. 4**). One of the overlapping peaks, ret. time 10.23 min, was identified as **4** by comparison of the mass spectrum and retention time with an authentic sample of germacrene D (**4**) produced by the wild-type SCO6073 synthase. The mass spectrum of the second overlapping peak, ret. time 10.25 min ( $[M]^+$   $m/z$  204, base peak  $m/z$  121; retention index (RI) 1482.77) was assigned to isolepidozene (**6**).

**Supplementary Table 1.** Mutagenic primers for *S. coelicolor* germacradienol–geosmin synthase (GS)

| Enzyme          | Plasmid          | Wild-type and mutant primer sequence <sup>a</sup>   |
|-----------------|------------------|-----------------------------------------------------|
| WT GS           | pRW31            | GTGGGTCTTCTTCTTCGACGACCACTTCCTGGAGAAGTACA           |
| D86E            | pRW31D86E        | GTGGGTCTTCTTCTTC <b>GA</b> AGACCACTTCCTGG           |
| L90D            | pRW31L90D        | CTTCTTCGACGACCACTTC <b>GAC</b> GAGAAGTACA           |
| WT GS           | pRW31            | AACGACCTCTTCTCCTACCAGCGCGAG                         |
| S233A           | pRW31S233A       | AACGACCTCTTCT <b>GCCT</b> ACCAGCGCGAG               |
| WT GS           | pRW31            | CGACGTCCTCACCTCGCGGCTGC                             |
| T271A           | pRW31T271A       | CGACGTCCTC <b>GCCT</b> CGCGGCTGC                    |
| S272A           | pRW31S272A       | CGACGTCCTCAC <b>CGCG</b> CGGCTGC                    |
| WT GS           | pRW31            | GGCACGTACGGCGACGACTACTACCCG                         |
| D455N/<br>D456N | pRW31D455N/D456N | GGCACGTACGGC <b>ATAA</b> TACTACCCG                  |
| WT GS           | pRW31            | GCGTGCCTGCTCAACGACGTCTTCTCCTACCAGAAGGAGATCGAGTACGAG |
| N598L           | pRW31N598L       | GCGTGCCTGCTC <b>CTAG</b> ACGTCTTCTCC                |
| D599L           | pRW31D599L       | TGCCTGCTCAAC <b>CTAG</b> TCTTCTCCTAC                |
| S602A           | pRW31S602A       | AACGACGTCTTCT <b>GCAT</b> ACCAGAAGGAG               |
| E606Q           | pRW31E606Q       | TCCTACCAGAAG <b>CAAA</b> TTCGAGTACGAG               |

a. Nucleotide substitutions are highlighted in **boldface**.

**Supplementary Table 2.** Distribution of products from incubation of FPP with C-terminal domain mutants of full-length germacradienol–geosmin synthase.

| Protein<br>( $\mu$ M) | FPP<br>( $\mu$ M) | Product Distribution (%) |                                |                              |                         |       |
|-----------------------|-------------------|--------------------------|--------------------------------|------------------------------|-------------------------|-------|
|                       |                   | geosmin<br>( <b>1</b> )  | germacradienol<br>( <b>3</b> ) | germacrene D<br>( <b>4</b> ) | octalin<br>( <b>5</b> ) |       |
| WT (pRW31)            | 9.2               | 82                       | 13                             | 74                           | 10                      | 3     |
| D455N/D456N           | 8.6               | 49                       | ND <sup>a</sup>                | 90                           | 10                      | trace |
| N598L                 | 13.8              | 61                       | ND                             | 81                           | 16                      | 3     |
| D599L                 | 8.3               | 42                       | ND                             | 85                           | 13                      | 2     |

---

|       |      |    |    |    |    |       |
|-------|------|----|----|----|----|-------|
| S602A | 11.2 | 53 | ND | 87 | 11 | 2     |
| E606Q | 8.3  | 55 | ND | 89 | 11 | trace |

---

<sup>a</sup> ND, not detected.

**Supplementary Table 3.** Sequence comparison of *S. coelicolor* SCO6073 germacradienol–geosmin synthase (Q9X839, CYC2\_STRCO) with bacterial orthologs. (For sequence alignments, see **Supplementary Figure 5.**)

| Organism                                    | UniProt ID            | aa  | Identity (%) | Similarity (%) |
|---------------------------------------------|-----------------------|-----|--------------|----------------|
| <i>Streptomyces scabies</i>                 | <sup>a</sup>          | 738 | 78           | 85             |
| <i>Streptomyces avermitilis</i>             | Q82L49                | 725 | 76           | 85             |
| <i>Streptomyces peucetius</i> ATCC 27952    | spterp13 <sup>b</sup> | 732 | 64           | 74             |
| <i>Frankia</i> sp. Strain Cc13              | Q2J565                | 751 | 60           | 72             |
| <i>Saccharopolyspora erythraea</i> NRL 2338 | A4FEI8                | 758 | 58           | 70             |
| <i>Frankia alni</i> ACN14a                  | Q0RBQ4                | 758 | 58           | 70             |
| <i>Frankia</i> sp. EAN1pec                  | Q3WJX6                | 750 | 59           | 72             |
| <i>Myxococcus xanthus</i> strain DK 1622    | Q1CYZ7                | 755 | 57           | 72             |
| <i>Saccharopolyspora erythraea</i> NRL 2338 | A4FJE8                | 763 | 56           | 69             |
| <i>Stigmatella aurantiaca</i> DW4/3-1       | Q09A24                | 704 | 55           | 67             |
| <i>Saccharopolyspora erythraea</i> NRL 2338 | A4FGS3                | 732 | 45           | 57             |

<sup>a</sup> *S. scabies* chromosome, nt 2284449-2282248; Sanger Centre, [http://www.sanger.ac.uk/Projects/S\\_scabies/](http://www.sanger.ac.uk/Projects/S_scabies/).

<sup>b</sup> *S. peucetius* genome sequence. Cf. Parajuli, N., Basnet, D.B., Chan Lee, H., Sohng, J.K. & Liou, K. Genome analyses of *Streptomyces peucetius* ATCC 27952 for the identification and comparison of cytochrome P450 complement with other *Streptomyces*. *Arch. Biochem. Biophys.* **425**, 233-241 (2004).

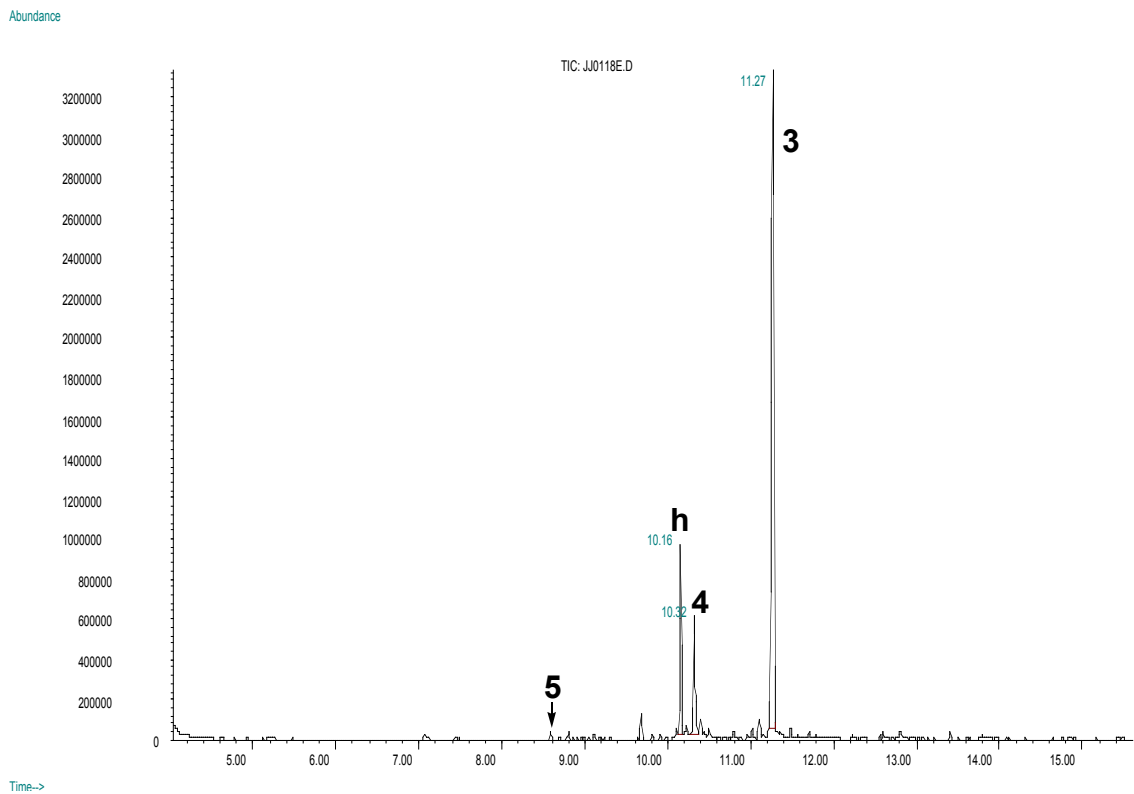

**Supplementary Figure 1.** Incubation of FPP (82  $\mu$ M) with recombinant N-terminal domain (pRW22p, 5.3  $\mu$ M) at 30  $^{\circ}$ C for 6.25 h. GC-MS (TIC): **3**, germacradienol; **4**, germacrene D; **5**, octalin; **h**,  $\alpha$ -humulene (**16**) internal standard.

Abundance

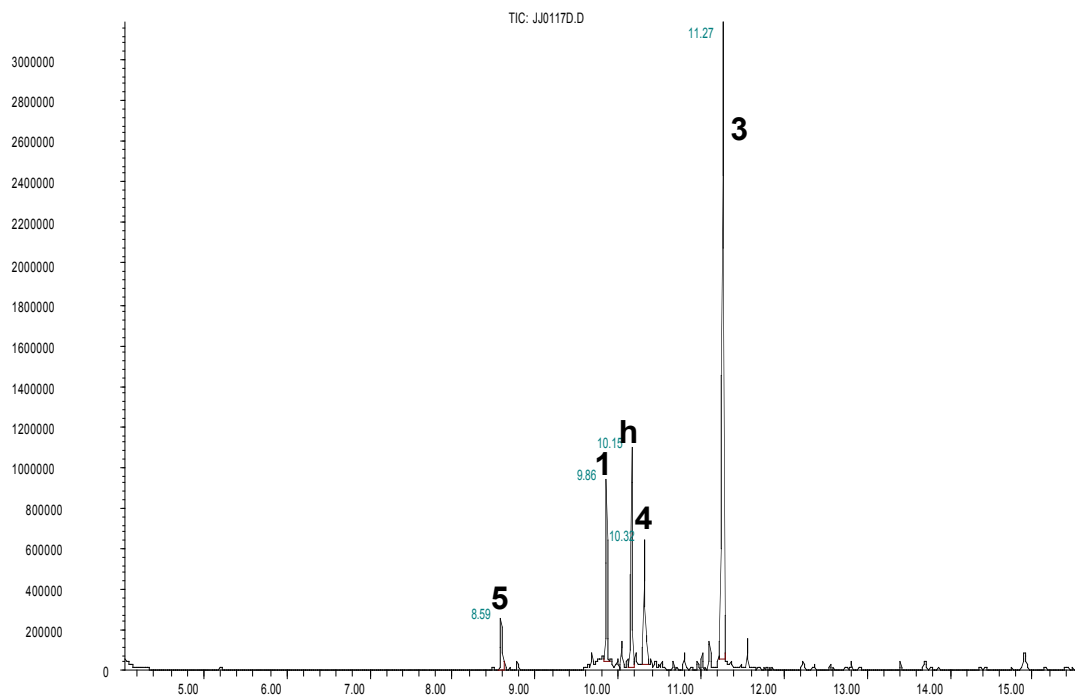

Time--&gt;

**Supplementary Figure 2.** Incubation of FPP (**2**) (82  $\mu$ M) with recombinant N-terminal domain (pRW22p, 5.4  $\mu$ M) and C-terminal domain (pJJ3p, 5.5  $\mu$ M) at 30 °C for 6.25 h. GC-MS (TIC): **1**, geosmin; **3**, germacradienol; **4**, germacrene D; **5**, octalin; **h**,  $\alpha$ -humulene (**16**) internal standard.

Abundance

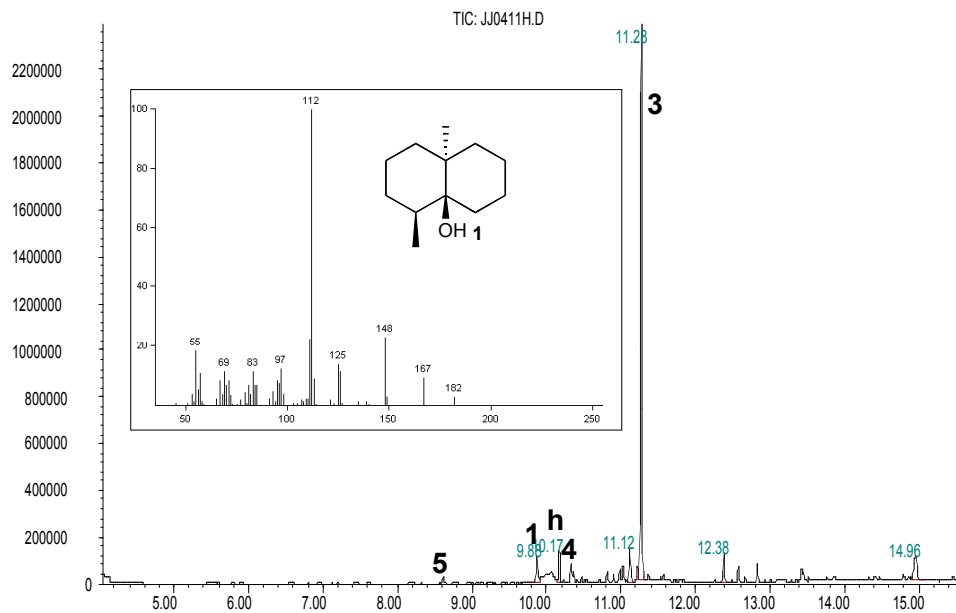

Time--&gt;

**Supplementary Figure 3.** Incubation of germacradienol (**3**) (containing germacrene D and octalin **5**, in 50  $\mu$ l MeOH) with recombinant C-terminal domain (3.1  $\mu$ M) and 4 mM  $Mg^{2+}$ . GC-MS (TIC): **1**, geosmin; **3**, germacradienol; **4**, germacrene D; **5**, octalin; **h**,  $\alpha$ -humulene (**16**) internal standard.

Inset: Mass spectrum of geosmin (**1**) ret. time 9.88 min.



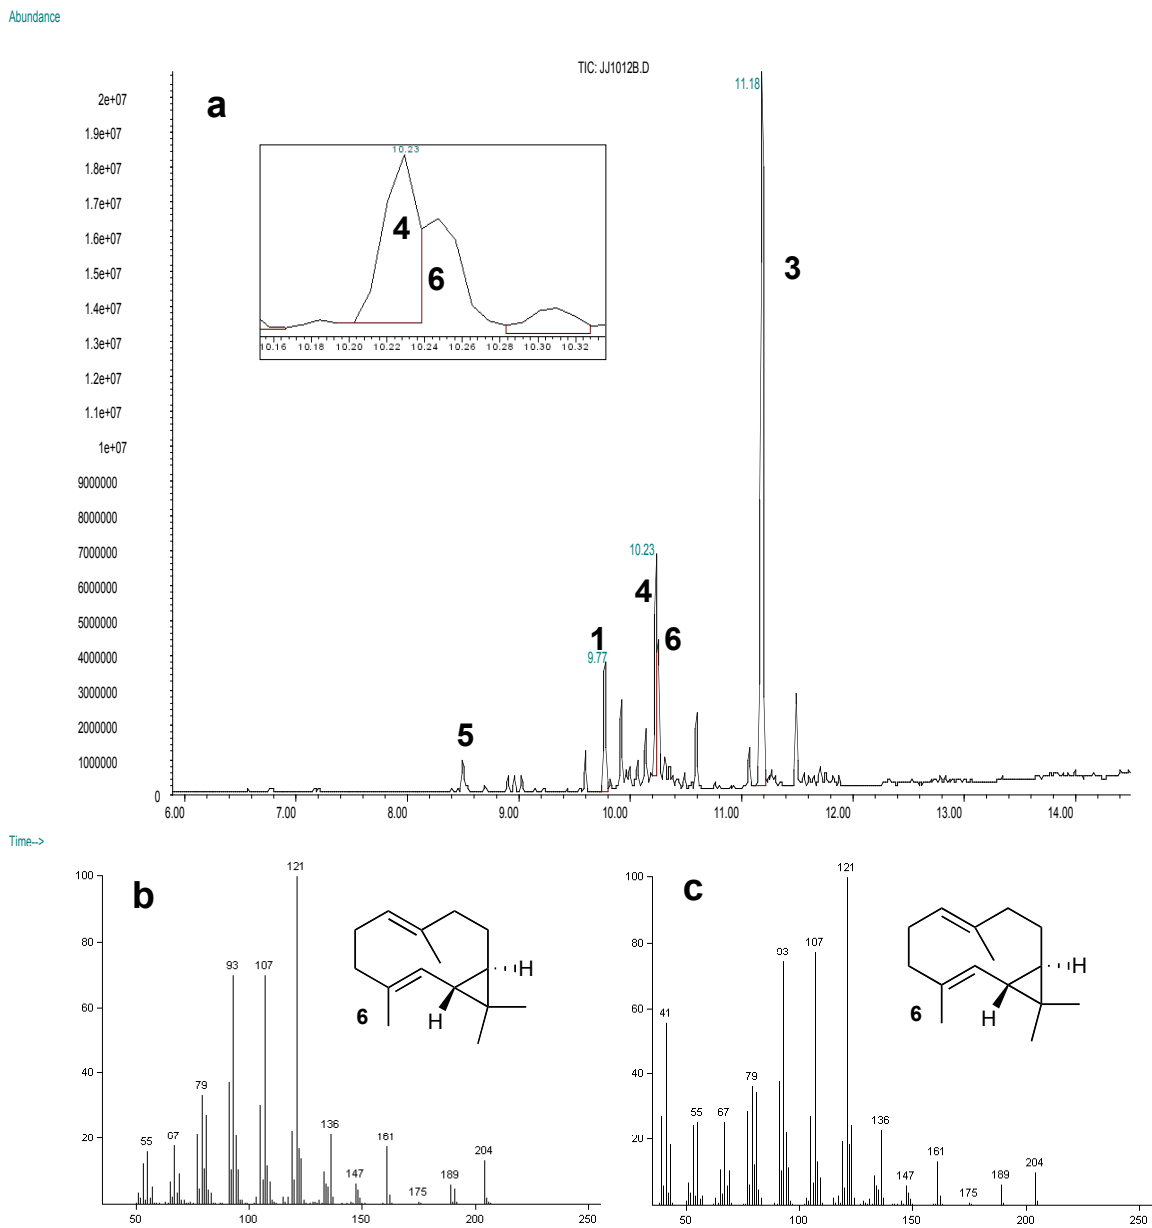

**Supplementary Figure 4.** Incubation of FPP (**2**) (165  $\mu\text{M}$ ) with 7.3  $\mu\text{M}$  GS mutant S233A at 30  $^{\circ}\text{C}$  for 7.25 h. **a.** GC-MS (TIC), Inset: Overlapping peaks at 10.23 min (germacrene D (**4**)) and 10.25 min (**6**). **b.** Mass spectrum of isolepidozene (**6**) ret. time 10.25 min, RI (retention index) 1483. The RI was calculated by the virtual carbon number method<sup>2</sup>, using germacrene D (virtual carbon number 14.79) and germacradienol (virtual carbon number 16.33), both present in the sample, as the internal references. **c.** Mass spectrum of isolepidozene (**6**) from MassFinder 3.0 Library, RI 1483. The corresponding *cis*-fused dimethylcyclopropyl stereoisomer, *E,E*-bicyclogermacrene, which has a mass spectrum very similar to **6**, has an RI value of 1494 and is therefore excluded.

CLUSTAL W (1.83) multiple sequence alignment

```

Q1CYZ7|Q1CYZ7_MYXXD      MSTAKNKQPFELPDFYVWPARLNPNLLEGARVHSAKWARELGIIGRPKDGSAPEIWSEAK 60
Q09A24|Q09A24_STIAU    -----
Q9X839|CYC2_STRCO        ----MTQPPQLPHFYLPHPARLNPHLDEARAHSTTWAREMGMLE-----GSGVWEQSD 50
Q82L49|Q82L49_STRAW    ----MTQPPQLPHFYMPYPARLNPHLDEARAHSTRWARGMGLE-----GSGIWEQSD 49
Q2J565|Q2J565_FRASC     ----MQPFTLPEFYVVPYPARLNPNLQARVHSAWADEMEMIDSPQH--GTAIWTEAD 52
Q0RBQ4|Q0RBQ4_FRAAA    ----MQPFTLPEFYVVPYPARLSPHLEQAREHSREWARAMEMIDTPQH--GIAIWTED 52
Q3WJX6|Q3WJX6_9ACTO     ----MQPFTLPEFYLPYPPRLNPNLHARVHSAWAGEMEMIDVPOD--GVAIWSGQD 52
A4FEI8|A4FEI8_SACEN     ----MQPFOQPEFYMPYPARLNPNLERAREHSAKAWACAMDIDVPOE--GTLIWDEND 52
A4FGS3|A4FGS3_SACEN     MPAPQQRQPYRLPAFYLPARLNPDLAARARSRRWAEEEMGLGSRAPPEGEQVWTRD 60

Q1CYZ7|Q1CYZ7_MYXXD      FDAMDYALLCAYTHPEAPGPELIDLVTDWYVWVFYFDDHFLELYKRPQDQVGAKAYLDRLP 120
Q09A24|Q09A24_STIAU    ---MDYALLCAYTHPEAPSLLELDLVTDWYVWVFYFDDHFLDVYKRTQDQVGAREYLDRLP 57
Q9X839|CYC2_STRCO      LEAHDYGLLCAYTHPDCDGPALSLITDWYVWVFFFDDHFLEKYKRSQDRLAGKAHLDRLP 110
Q82L49|Q82L49_STRAW    LDAHDIYGLLCAYTHPDCDGPALSLITDWYVWVFFFDDHFLETFKRTQDREGGKAYLDRLP 109
Q2J565|Q2J565_FRASC     FDAHDIYALLCAYTHPDSVSRKLDLVTDWYVWVFYFDDHFLELYKRSHDMAGARAYLDRLP 112
Q0RBQ4|Q0RBQ4_FRAAA    LDAHDIYALLCAYTHPDATADRNLNITDWYVWVFYFDDHFLELYKRSHDLAGARAYLDRLP 112
Q3WJX6|Q3WJX6_9ACTO     FDSHDYALLCAYTHPDADEARLDLITDWYVWVFYFDDHFLEVYKGRDVGAGARYLDRLP 112
A4FEI8|A4FEI8_SACEN     FDSHDYALLCAYTHPDADGPMMLDLITDWYVWVFYFDDHFVLEYKRNPDLAGAKEYLDRLP 112
A4FGS3|A4FGS3_SACEN     FDRHDIYALLCAYAHPDASAPALELITGWYVWVFFFDDHFLLARYKRTGDVDGARAHLLGLA 120

Q1CYZ7|Q1CYZ7_MYXXD      LFMPVDPAATPPPTNPVEAGLLDLWNRTVPSRSMARRRFFESTKHLLEDESSWELSNIS 180
Q09A24|Q09A24_STIAU    AFMPVDLSAAPTPTNPVERGLADLWARTVPTKSEAWRRRFFESTKSLLLESNWELNNIS 117
Q9X839|CYC2_STRCO      LFMPLDLDAAGMPEPRNPVEAGLADLWTRTPAMASADWRRRFAVATEHLLNESMWELSNIN 170
Q82L49|Q82L49_STRAW    LFMPDLDSAPVPEPENPVEAGLADLWARTVPAMASADWRKRFAVSTEHLLNESLWELSNIN 169
Q2J565|Q2J565_FRASC     AFMPVDGEITE-TPTNPVERGLADLWTRTPERSADWRRRFAVSTKNLLEDESLWELANIN 171
Q0RBQ4|Q0RBQ4_FRAAA    AFMPVDGEITE-EPSNPVERGLADLWTRTPARSADWRARFAVSTRNLLDESLWELENIN 171
Q3WJX6|Q3WJX6_9ACTO     LFMPVEGAVTA-EPANPVERGLADLWSRTVPDRTPAWRRRFATSTRHLLDESLWELANID 171
A4FEI8|A4FEI8_SACEN     AFMPVEGPITA-EPTNPVERGLADLWQRTVPARTADWRRRYAENTKHLLEDESLWELSNIS 171
A4FGS3|A4FGS3_SACEN     ELMPVGPSDAAPATGPVERGLADLWVRTAPEVPARWLVRFAASTRELLENRLRELTGTS 180

Q1CYZ7|Q1CYZ7_MYXXD      DRRVSNPIEYIEMRRKVGAPWSANLVEHAVFAEVPDRVAASRPMRVLKDTFSDAVHLRN 240
Q09A24|Q09A24_STIAU    ERRVSNPIEYIEMRRKVGAPWSADLVEHAVFAEIPARIAASRPMTVLKDTFSDGVHLRN 177
Q9X839|CYC2_STRCO      EGRVANPVEYIEMRRKVGAPWSAGLVEYAT-AEVPAAVAGTRPLRVLMEETFSDAVHLRN 229
Q82L49|Q82L49_STRAW    EGRLANPVEYIEMRRKVGAPWSAGLVEYAT-AEVPAAVAGSRPLRVLMEETFSDGVHLRN 228
Q2J565|Q2J565_FRASC     AGRLANPIEYIEMRRKVGAPWSANLVEHAADAIEVPAQVAATRPLQVLRDTFADAVHLRN 231
Q0RBQ4|Q0RBQ4_FRAAA    AARLSNPIEYIEMRRKVGAPWSANLVEHAADAIEVPAVVAATRPLQVLRDTFADAVHLRN 231
Q3WJX6|Q3WJX6_9ACTO     ENRLANPVEYIEMRRKVGAPWSANLVEHAADAIEVPAIAAATRPAQVLRDTFSDAIHLRN 231
A4FEI8|A4FEI8_SACEN     RNRLSNPIEYIEMRRKVGAPWSANLVEHAVDSEVPAIASARPMQVLRDTFSDAVHLRN 231
A4FGS3|A4FGS3_SACEN     RCGVNPVDHIAMRREAGGASWSAALVEYAAAGSEVPDVVARSRPMRVLDRDSFCDGVHLRN 240

Q1CYZ7|Q1CYZ7_MYXXD      DLFSYEREILEEGELSNGLVLMKFLNISPPSAHLVNEVLTSRLQGFENTVLTTELPSLF 300
Q09A24|Q09A24_STIAU    DLFSYQREIQEEGELANCLVLFKFLNVDAQRAANLVNEVLTSRLQGFENTALTELPSLF 237
Q9X839|CYC2_STRCO      DLFSYQREVEDEGELSNGLVLETFFGCTTQEAADLVNDVLTSLRHQFEHTAFTEVPAVA 289
Q82L49|Q82L49_STRAW    DLFSYQREVEEEGELSNGLVLETFFGCTTQEAETVNDILTSRLRHQFEHTALTEVPALA 288
Q2J565|Q2J565_FRASC     DLFSYQREVEEEGELSNGLVIERFLGCGTQEAADTVNDLLTSRLRHQFEHTAVTELPVAV 291
Q0RBQ4|Q0RBQ4_FRAAA    DLFSYEREVTEEGELSNGLVVERFLDIDTQAAADTVNDLLTSRLRHQFEHTAATELPVAV 291
Q3WJX6|Q3WJX6_9ACTO     DLFSYQREVEEGELSNGLVLERFLDCPTQQAADAVNDLLTSRLRHQFEHTALTELPVAV 291
A4FEI8|A4FEI8_SACEN     DLFSYQREVDDEGELSNGLVLFKFLDCSTQDAADTVNDLLTSRLRHQFEHTALTEVPALL 291
A4FGS3|A4FGS3_SACEN     DIFSYPRETSSEEGELGNGLVVVERFFDTPQEAADTVNDLLTSRLRHQFENVTLTELPAMF 300

Q1CYZ7|Q1CYZ7_MYXXD      VEFGLNPVEQAQVLTYYRGLQDWQSGGHEWHMRSSRYMKNKGGGAG----- 346
Q09A24|Q09A24_STIAU    EENALNPVERAHVLTYYRGLQDWQSGGHEWHMRSSRYMKNKAGGAGDTD----- 286
Q9X839|CYC2_STRCO      LEKGLTPLEVAAVGAYTKGLQDWQSGGHEWHMRSSRYMKNKERPLAGWQA----- 339
Q82L49|Q82L49_STRAW    LEKGLTPPEVAAVAAAYARGLQDWQSGGHEWHLRSSRYMNEGALSQKRPFG----- 338
Q2J565|Q2J565_FRASC     EEHGVDPGSRLEVLAYVKGLQDWQSGGHEWHLRSSRYMNRVAPESGE----- 339
Q0RBQ4|Q0RBQ4_FRAAA    DEHAIDPAGRLAALAYIKGLQDWQSGGHEWHLRSSRYMREATPDVPPGLGPLAGLGGT 351
Q3WJX6|Q3WJX6_9ACTO     DEHGVTPPTARRDVLAYVKGLQDWQAGGHEWHMRSSRYMNAESGATGPVP----- 340
A4FEI8|A4FEI8_SACEN     DENGVDPQGRLAVLGYVKGLQDWQSGGHEWHIRSSRYMNEGLVEQSALAGQSAPQPALP 351
A4FGS3|A4FGS3_SACEN     EEHGLSPVERADVLDYVKGLQDWQSGAHEWHLRSGRYAVPGGAEPREPRR----- 350

```

|        |              |                                                                 |     |
|--------|--------------|-----------------------------------------------------------------|-----|
| Q1CYZ7 | Q1CYZ7_MYXXD | -----GFFLGPNGLGTS AARLPQSPTALGLTRLK N FSHVYQPVGPVKLPK FY        | 394 |
| Q09A24 | Q09A24_STIAU | -----GLPLGLSGLGLS AVRPFPSASALGLNRFK SFTHTPYMPVGPVKLPK FY        | 334 |
| Q9X839 | CYC2_STRCO   | -----LTGPGTSAADV GALLADAVAQRARSYTYVFPQKVGPSVIPDIR               | 382 |
| Q82L49 | Q82L49_STRAW | -----LSAIGTSAADLRGLLADAGAERLRRYTHVFPQKVGPSRIPDFH                | 381 |
| Q2J565 | Q2J565_FRASC | -----LSGLLG-LTGLGTS AARIVPSLVTTTPRRIRSFTHIPHQIVGPLRHPDFC        | 388 |
| Q0RBQ4 | Q0RBQ4_FRAAA | GSLVPA A--GLPGIPG-IPSLGTS AIQVLPSSLATAPRRIRSFANVPFRLVGP TPLPEFY | 408 |
| Q3WJX6 | Q3WJX6_9ACTO | -----GSLPGDATGLGTS AVRIAASLLATAPARMRAFTHVPHQVVG PVPKLP AFY      | 389 |
| A4FEI8 | A4FEI8_SACEN | QSAPDGTGPA TQPVVGGPTGLGTS AARIVQSLSTAPQRIRSFTHTPYEPAGPI RMPEIY  | 411 |
| A4FGS3 | A4FGS3_SACEN | -----FLSGPHGLGTSSSHLGS LLRTVRRPGLPIPHGQLRYARIA---VPAMS          | 394 |
|        |              |                                                                 |     |
| Q1CYZ7 | Q1CYZ7_MYXXD | MPYSTKPSPHLDAARRDS KAWARRMGMLDVLPGVPGGYIWDH KFDVADVALCGAL IHPH  | 454 |
| Q09A24 | Q09A24_STIAU | MPYSTSVSPHLDAARRHS KEWARQMGMLDSLPGVGYIWDH KFDVADVALCGAL IHPH    | 394 |
| Q9X839 | CYC2_STRCO   | MPYPLELSPALDGARRHLS EWCREMGILS--EG-----VWDEDKLESCDLP LCAAGLDPD  | 435 |
| Q82L49 | Q82L49_STRAW | MPFQVELSPHLEGARARLT PWHSTGM LQ--EG-----VWDEDKLTAYDLP LCSAGLDPD  | 434 |
| Q2J565 | Q2J565_FRASC | MPFSTGQSPHL DASRRENI IWARAVGMLDPIPG-----IWDEHKLRAFDFALCSAGIHPD  | 443 |
| Q0RBQ4 | Q0RBQ4_FRAAA | LPYTTGLSPHL DSSRRAIIPWARS MGMLDRVPG-----IWDEHKLWYDFALCSAGIHPD   | 463 |
| Q3WJX6 | Q3WJX6_9ACTO | MPFTTGESRHLAAARHNIVEWSAAVGF LDVPVG-----IWDEHKLRAADFALCSAAIHPN   | 444 |
| A4FEI8 | A4FEI8_SACEN | MPFDLSLSPHL DVCRENTAAWARAMGIFDDVPR-----VWDE NQMRGYDLP LCSAGLDPD | 466 |
| A4FGS3 | A4FGS3_SACEN | SPHPVRTNPQVGT VRAHAKEWARRMGMLD GSG-----VWTANVFDAADFGQFSAMAHPD   | 448 |
|        |              |                                                                 |     |
| Q1CYZ7 | Q1CYZ7_MYXXD | ATAAQLNLSSCWL VVGTYADDYFPAFYGH TKDMAGAKVFNARLALFVPEDAGAVVPPPTN  | 514 |
| Q09A24 | Q09A24_STIAU | ASAEQLNLTA CWL VVGTYADDYFPAFYGYTRDMAGAKLFNARLSAFMPDGPCTAVP--TN  | 452 |
| Q9X839 | CYC2_STRCO   | ATQDQLDLASGWLAFGT YGDDYPLVYGHRRDLAAARLT TTRLSDCMPLD-GEPVPPPGN   | 494 |
| Q82L49 | Q82L49_STRAW | ATPDELDSL RVLAWGT YGDDYPMVFGPRRD LAAAKLCTRRLSACMPVD-GEEVPAPVN   | 493 |
| Q2J565 | Q2J565_FRASC | ATLPELNLTTDWLTWGT YADDYYPVIFGRTRD ILGAKVCNARLSEFMPLD-SPVTAVPAN  | 502 |
| Q0RBQ4 | Q0RBQ4_FRAAA | ATADELDTTAWLTWGT YGDDYYPVIFGASRN LAAAKLCNERLRLFMVVD-GPLTEPPVN   | 522 |
| Q3WJX6 | Q3WJX6_9ACTO | ATAAELDTTGWLTWGT YADDLYPVLYGRTRDLAGARACTERLKLMPVE-PGPLVPVG      | 503 |
| A4FEI8 | A4FEI8_SACEN | ATPEELDLSA AWTWGT YGDDYYPVFGRTLDMAGARACNARLKLMPVE-SAPATAPVT     | 525 |
| A4FGS3 | A4FGS3_SACEN | SPGPELELVNDHWVWGWFFDDFFTEVFKR SRNRAGAEAF LARLPGFMPAD-TRRTPAPAN  | 507 |
|        |              |                                                                 |     |
| Q1CYZ7 | Q1CYZ7_MYXXD | PVERGLADLWARTTEGVT PASRSLFRKAILDMTESWVWELANQIQNRIPDPIDYVEMRRQ   | 574 |
| Q09A24 | Q09A24_STIAU | PVEHGLADLWARTAGPMT DNARRLFRKAIQDMTASWLWELANQIQNRIPDPDYVEMRRK    | 512 |
| Q9X839 | CYC2_STRCO   | AMERSLIDLWVRTTAGMTP EERRPLKKA VDDMTEAWLWELSNQIQNRVPDPVDYLEMRRR  | 554 |
| Q82L49 | Q82L49_STRAW | GMERGLIDLWAI TTAEMTPDERRTFRASVDVMTESWVWELSNQLQHRIPDPIDYLEMRRR   | 553 |
| Q2J565 | Q2J565_FRASC | ALERGLADLWRTTETMAPGARETFRGTVEVMIDSWLWELANQAQNRIPDPIDYIEMRRR     | 562 |
| Q0RBQ4 | Q0RBQ4_FRAAA | ALERGLADLWERTGAGMPEAARATFRRTIEVMIDSWLWELANQAHNRI PDPVDYLEMRRR   | 582 |
| Q3WJX6 | Q3WJX6_9ACTO | GLERGLADLWPR TTRDMTPDSRRTFRRTV C IMLDSWQWELANQAQNRIPDPVDYIEMRRR | 563 |
| A4FEI8 | A4FEI8_SACEN | PLERGLADLWARTAGMPVETRRRFRAAVDTMIDSWLWELHNQHLNRI PDPVDYFEMRRR    | 585 |
| A4FGS3 | A4FGS3_SACEN | PVERGLADLWARTPVLAPRLRRRFP EHVNRNFVGSWLWELDNLIQNRVSDPVDYLRMRRR   | 567 |
|        |              |                                                                 |     |
| Q1CYZ7 | Q1CYZ7_MYXXD | TFGSDLTMSLSRLAHG---DALPPEVFHTRPIRSL ENSAADYACLINDVFSYQKEIEFEG   | 631 |
| Q09A24 | Q09A24_STIAU | TFGSDLTMSLSRLAHG---DAIQEIEFHTR PVRGLENSAADYACLINDVFSYQKEIEYEG   | 569 |
| Q9X839 | CYC2_STRCO   | TFGSDLTGLCRAGHG---PAVPPEVYRSGPVRSL ENAADIYACLINDVFSYQKEIEYEG    | 611 |
| Q82L49 | Q82L49_STRAW | TFGADLTLSLCRVGHG---PKVPPEIYRSGPVRSL ENAADVYGLINDVFSYQKEIEYEG    | 610 |
| Q2J565 | Q2J565_FRASC | TFGSDLTMSLARLARLAQE TVPPEIYRTRPIQALENAADYACLINDVFSYQKEIQFEG     | 622 |
| Q0RBQ4 | Q0RBQ4_FRAAA | TFGSDLTMSLCRLAR---WHSVPAE VFGTRPLRAL ENAADYACLINDVFSYQKEIQFEG   | 639 |
| Q3WJX6 | Q3WJX6_9ACTO | TFGSDLTMSLSRLGHG---RSVPPEIYGT RPIRAL ENAADYSCLLNDVFSYQKEIQFEG   | 620 |
| A4FEI8 | A4FEI8_SACEN | TFGSDLTISLAKFSHG---EAVPPEIYRTRIRNMENSAIDYATMLNDVFSYRKEIEYEG     | 642 |
| A4FGS3 | A4FGS3_SACEN | TGGSAFR GALARHTLG---AGLAPAVFDTPEMRALHENWADVGPLRNDLFSYHKEVDRET   | 624 |
|        |              |                                                                 |     |
| Q1CYZ7 | Q1CYZ7_MYXXD | ELNNGVLVVQRFLDLDPARAVSVVNDLMTARMQOFEYII ANELEPLARNFNLDGKAQDKL   | 691 |
| Q09A24 | Q09A24_STIAU | ELNNGVLVVQRFL EIEPPQAVEIVNDLMTARMQOFEHTVKMELPLLIRSTGLDAKAQEKL   | 629 |
| Q9X839 | CYC2_STRCO   | EIHNAVLVVQNFFGVDYPAALGVVQDL MNQRMQFEHVVAHEL PVVYDDFQLSEARTVM    | 671 |
| Q82L49 | Q82L49_STRAW | EVHNAILVVQNFFGCDYPTALGVINDLMTQRMHQFEHVAAHEL PPLYKDFKLPQEV RDIM  | 670 |
| Q2J565 | Q2J565_FRASC | EIHNCVLVVENFLDCDRERALAVVNDLMTSRIRQFEHIVAHHEL PALFDSFALDASARQAL  | 682 |
| Q0RBQ4 | Q0RBQ4_FRAAA | EIHNCVLVVENFLDCDRGRAVEVVNDLMTARMQOFEHVVDREL PDLFDRDLDGEARAAI    | 699 |
| Q3WJX6 | Q3WJX6_9ACTO | EIHNCVLVFNFLGCGAERATGVVNDLMTARLREFEHVVDVELPALFDYELTEARDVL       | 680 |
| A4FEI8 | A4FEI8_SACEN | EVHNAVLVVRNFLDCDQDRAFEIVGDLMTARMQOQYTVDELPVLCEDFGLSSESRAVL      | 702 |
| A4FGS3 | A4FGS3_SACEN | EVTNGVLAVQRFFDCGLQAAAVVDLAEVRLRRFTAVAEQELPALAHRFEPGRAPREEL      | 684 |

|        |                   |                                                                   |     |
|--------|-------------------|-------------------------------------------------------------------|-----|
| Q1CYZ7 | Q1CYZ7_MYXXD      | <b>KQYVQKLQW</b> MSGVLIWHQTVDRYKEFELRASRK-----LAPRLSSGPTGLGTS     | 740 |
| Q09A24 | Q09A24_STIAU      | <b>RTYVEKLR</b> WMCVLRWHMTVDRYKEFELRNTRKPRRGGWEDPRDGAPRPASRRSLGAT | 689 |
| Q9X839 | Q9X839_CYC2_STRCO | <b>RGYVTDLQ</b> NWMAGILNWHRNVPYKAEYLAGRTHGFLE-----PDRIPAPPVPRSSP  | 722 |
| Q82L49 | Q82L49_STRAW      | <b>DGYVVELQ</b> NWMSGILKWHQDCHRYGAADLARRAHGFV-----PDRAPAPFTAWAA   | 721 |
| Q2J565 | Q2J565_FRASC      | <b>LGYARELQ</b> NWLAGILRWHEGTHRYEESELRYHPAAG-----VRPFGGPTGLGTS    | 731 |
| Q0RBQ4 | Q0RBQ4_FRAAA      | <b>VSARELQ</b> NWLAGILRWHQGTHRYEEAEELRYHPAAD-----RRPFGSPTGLGTS    | 748 |
| Q3WJX6 | Q3WJX6_9ACTO      | <b>RGYVGELK</b> SWLAGVLRWHQGTRRYDEAELRHHPAVG-----VRPFGGPVGLGTS    | 729 |
| A4FEI8 | A4FEI8_SACEN      | <b>TRYADELR</b> DWMSGILNWHRECVRYKDEDLRHDAVSQG-----LAALLRGPSSGLGTS | 753 |
| A4FGS3 | A4FGS3_SACEN      | <b>DRYVRGLH</b> DWLAGELAWSQVTGRYREPSVSAVGADLP-----AAPLGITGA       | 730 |
| Q1CYZ7 | Q1CYZ7_MYXXD      | AARITSLFANLRSGA-----                                              | 755 |
| Q09A24 | Q09A24_STIAU      | <b>GAEVEKKLE</b> KSGSST-----                                      | 704 |
| Q9X839 | Q9X839_CYC2_STRCO | <b>AL</b> TH-----                                                 | 726 |
| Q82L49 | Q82L49_STRAW      | <b>P</b> VAR-----                                                 | 725 |
| Q2J565 | Q2J565_FRASC      | <b>SAHVRPRP</b> AAAAAGAGDSEM-                                     | 751 |
| Q0RBQ4 | Q0RBQ4_FRAAA      | <b>AADVR</b> -RLASR-----                                          | 758 |
| Q3WJX6 | Q3WJX6_9ACTO      | <b>AADIRRAL</b> SGKSGOPTALTGS                                     | 750 |
| A4FEI8 | A4FEI8_SACEN      | <b>AVEL</b> R-----                                                | 758 |
| A4FGS3 | A4FGS3_SACEN      | <b>AG</b> -----                                                   | 732 |

**Supplementary Figure 5.** ClustalW Alignment of presumptive germacadienol–geosmin synthases with *S. coelicolor* SCO6073. Q1CYZ, *Mycococcus xanthus* strain DK 1622; Q09A24, *Stigmatella aurantiaca* DW4/3-1; Q9X839, *S. coelicolor* A3(2); Q82L49, *S. avermitilis*; Q2J565, *Frankia* sp. Strain Cc13; Q0RBQ4, *Frankia alni* ACN14a; Q3WJX6, *Frankia* sp. EAN1pec; A4FEI8 and A4FGS3, *Saccharopolyspora erythraea* NRL 2338. Conserved Mg<sup>2+</sup>-binding motifs are highlighted in bold.

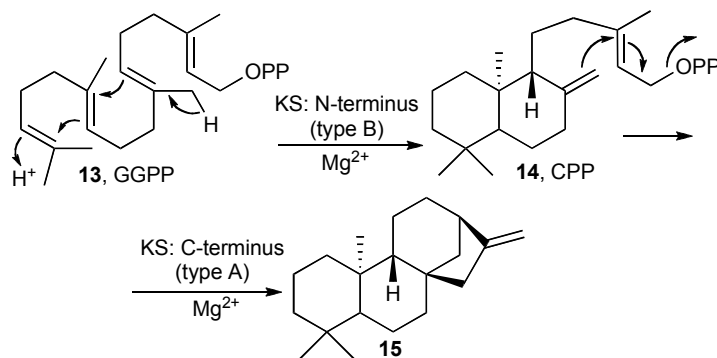

**Supplementary Scheme 1.** Cyclization of geranylgeranyl diphosphate (**13**, GGPP) to copalyl diphosphate (**14**, CPP) and *ent*-kaurene (**15**) by bifunctional fungal *ent*-kaurene synthase (KS).

### Supplementary References

1. Cane, D.E. & Watt, R.M. Expression and mechanistic analysis of a germacadienol synthase from *Streptomyces coelicolor* implicated in geosmin biosynthesis. *Proc. Natl. Acad. Sci. U S A* **100**, 1547-1551 (2003).
2. Harangi, J. Retention index calculation without n-alkanes – the virtual carbon number. *J. Chromatogr. A* **993**, 187-195 (2003).
